# Supplementary material for: The Complete Genome Sequence of Thermoproteus tenax: A Physiologically Versatile Member of the Crenarchaeota
Source: PubMed Central journal article supplement (PMC3189178; doi:10.1371/journal.pone.0024222), 2011-10-07
Supplement: pone.0024222.s001.pdf [file pone.0024222.s001.pdf]

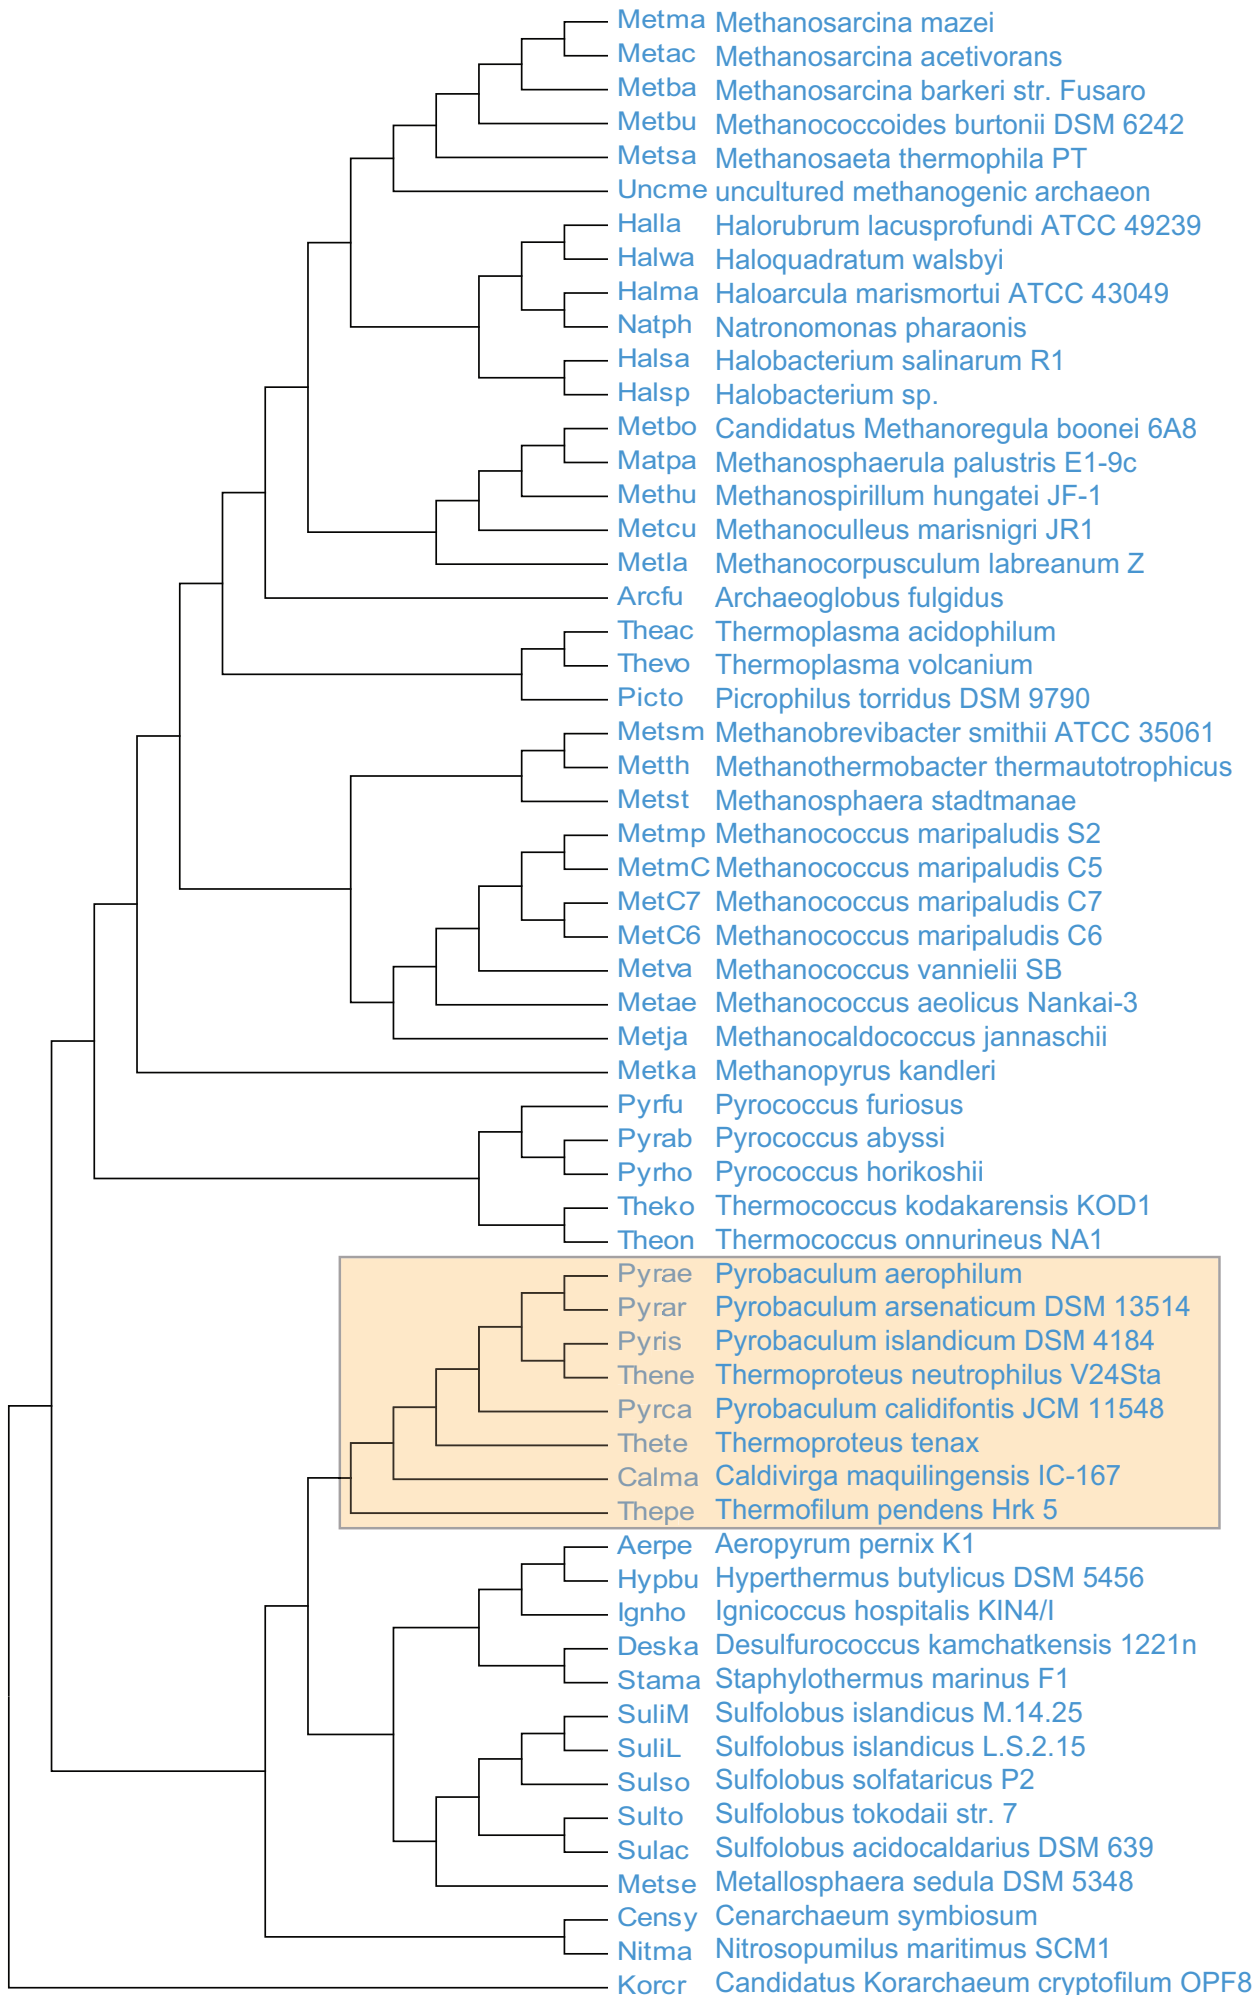

**Figure S1. Guide tree topology used for reconstruction of evolutionary events for the *Thermoproteales* lineage.** The tree represents the consensus view of archaeal phylogeny based on recent publications [16,99,98]. The *Thermoproteales* branch is shaded.
