# Supplementary material for: The Complete Genome Sequence of Thermoproteus tenax: A Physiologically Versatile Member of the Crenarchaeota
Source: PubMed Central journal article supplement (PMC3189178; doi:10.1371/journal.pone.0024222), 2011-10-07
Supplement: pone.0024222.s002.pdf [file pone.0024222.s002.pdf]

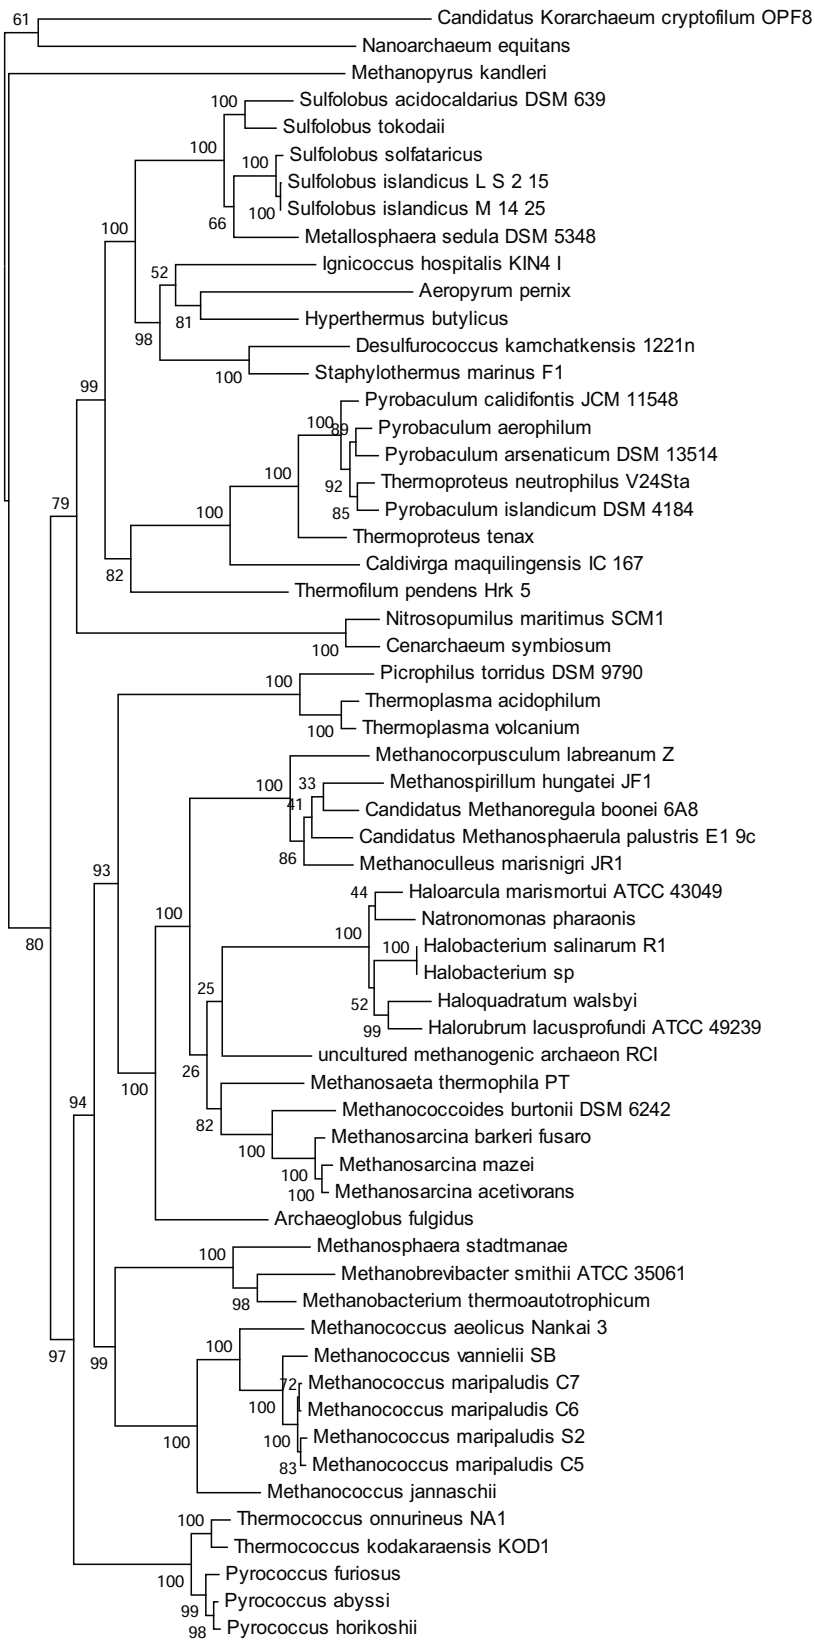

0.2

**Figure S2. Phylogeny of *Archaea* based on analysis of RNA polymerase subunits.** Maximum likelihood tree made from aligned sequences of the three largest RNA polymerase subunits: a, a', and b as described previously [99]. Bootstrap support numbers are given at the nodes as a percentage (n = 10,000). Scale bars represent the average number of substitutions per residue.
