# Supplementary material for: The Complete Genome Sequence of Thermoproteus tenax: A Physiologically Versatile Member of the Crenarchaeota
Source: PLoS One. 2011 Oct 7;6(10):e24222. doi: 10.1371/journal.pone.0024222 (PMC3189178; doi:10.1371/journal.pone.0024222)
Supplement: Table S7 — Comparative genomic analysis using arCOGs. Core genes: The number of organisms in the corresponding archaeal lineages and number of proteins in individual genomes for respective arCOGs are given. Gain-loss-expansion: Results of the analysis of gene loss, gain and family expansion using arCOG data and COUNT software (http://www.iro.umontreal.ca/~csuros/gene_content/count.html) are given. Abbreviations: CREN - Crenarchaeota; EURY - Euryarchaeota; Tauma - Taumarchaeota; Korar - Korarchaeota; Nano - Nanoarchaeota; Thete - Thermoproteus tenax; All other organism abbreviations are explained in Figure S1. (XLSX) [file pone.0024222.s009.xlsx]

## Sheet: Core genes 
Table S7. Comparative genomic analysis using arCOGs.
Core genes: The number of organisms in the corresponding archaeal lineages and number of proteins in individual genomes for respective arCOGs are given. Gain-loss-expansion: Results of the analysis of gene loss, gain and family expansion using arCOG data and COUNT software (http://www.iro.umontreal.ca/~csuros/gene_content/count.html) are given. Abbreviations: CREN - Crenarchaeota; EURY - Euryarch…
						NUMBER OF ORGANISMS in the CORRESPONDING ARCHAEAL LINEAGES and NUMBER of PROTEINS in INDIVIDUAL GENOMES for respective arCOGs
														Cren, Thermoproteales	Cren, Thermoproteales	Cren, Thermoproteales	Cren, Thermoproteales	Cren, Thermoproteales	Cren, Thermoproteales	Cren, Thermoproteales	Cren, Thermoproteales	Cren, Sulfolobales	Cren, Sulfolobales	Cren, Sulfolobales	Cren, Sulfolobales	Cren, Sulfolobales	Cren, Sulfolobales	Cren,Desulfurococcales	Cren,Desulfurococcales	Cren,Desulfurococcales	Cren,Desulfurococcales	Cren,Desulfurococcales
Representative protein (identified by GI number)	arCOG number	COG number	Gene	Function as in http://www.ncbi.nlm.nih.gov/COG/grace/fiew.cgi	Annotation in arCOGs	All Organisms	Number of Proteins	CREN	EURY	Tauma	Korar	Nano	Thermoproteales	Calma	Pyrae	Pyrca	Pyris	Pyrar	Thete	Thepe	Thene	Sulac	Sulso	SuliL	SuliM	Sulto	Metse	Aerpe	Deska	Hypbu	Stama	Ignho
In all Thermoproteales but not in Thermoproteus tenax
14601101	arCOG01304	COG01637	-	L	Predicted nuclease of the RecB family	37	40	16	21	0	0	0	7	1	1	1	1	1	0	1	1
126353888	arCOG00975	COG00144	Sun	J	tRNA or rRNA cytosine-C5-methylase	22	33	16	6	0	0	0	7	1	1	1	1	1	0	1	1
126354345	arCOG05463			S	Uncharacterized conserved protein	16	16	13	0	2	1	0	7	1	1	1	1	1	0	1	1
118431059	arCOG00921	COG01318	-	K	Predicted transcriptional regulator	21	23	12	7	0	1	1	7	1	1	1	1	1	0	1	1
126458660	arCOG05461			S	Uncharacterized conserved protein	7	11	7	0	0	0	0	7	1	2	2	2	1	0	2	1
In all Thermoproteales but not in other Crenarchaeota
11498313	arCOG02245	COG01836	-	S	Predicted membrane protein	45	45	8	36	0	1	0	8	1	1	1	1	1	1	1	1
11499788	arCOG01223	COG01019	-	R	Predicted nucleotidyltransferase	45	46	8	34	2	1	0	8	1	1	1	1	1	1	1	1
126353703	arCOG01395	COG01817	-	R	Lipid-A-disaccharide synthase related glycosyltransferase	33	44	8	22	2	1	0	8	1	1	1	1	1	1	1	1
126354060	arCOG03260	CPLUS033		S	Uncharacterized conserved protein	14	23	8	6	0	0	0	8	1	1	1	1	1	1	10	1
126352992	arCOG01118	COG01522	Lrp	K	Transcriptional regulator (Lrp/AsnC family)	13	13	8	5	0	0	0	8	1	1	1	1	1	1	1	1
126353667	arCOG00431	COG02404	-	R	Predicted phosphohydrolase (DHH superfamily)	9	9	8	0	0	1	0	8	1	1	1	1	1	1	1	1
126353523	arCOG01882	COG00170	SEC59	I	Dolichol kinase	9	9	8	0	0	1	0	8	1	1	1	1	1	1	1	1
126353669	arCOG05515			S	Predicted permease	9	9	8	0	0	1	0	8	1	1	1	1	1	1	1	1
126353493	arCOG05582			S	Uncharacterized conserved protein	9	9	8	0	0	1	0	8	1	1	1	1	1	1	1	1
126354161	arCOG05583	COG05277	-	R	Actin related protein	9	9	8	0	0	1	0	8	1	1	1	1	1	1	1	1
126354066	arCOG00599	COG01192	Soj	D	ATPase involved in chromosome partitioning, ParA family	8	9	8	0	0	0	0	8	1	2	1	1	1	1	1	1
126353937	arCOG00741	COG00640	ArsR	K	Transcriptional regulator containing HTH domain, ArsR family	8	8	8	0	0	0	0	8	1	1	1	1	1	1	1	1
126353646	arCOG03746	CPLUS080		S	Uncharacterized conserved protein	8	8	8	0	0	0	0	8	1	1	1	1	1	1	1	1
126353448	arCOG03760			S	Uncharacterized conserved protein	8	8	8	0	0	0	0	8	1	1	1	1	1	1	1	1
126354011	arCOG05487			S	Uncharacterized conserved protein	8	9	8	0	0	0	0	8	1	1	1	1	1	1	2	1
126354866	arCOG05523			S	Uncharacterized conserved protein	8	8	8	0	0	0	0	8	1	1	1	1	1	1	1	1
126354777	arCOG05585			S	Uncharacterized conserved protein	8	8	8	0	0	0	0	8	1	1	1	1	1	1	1	1
18313756	arCOG05654			S	Uncharacterized conserved protein	8	8	8	0	0	0	0	8	1	1	1	1	1	1	1	1
126353697	arCOG05666	COG02908	-	S	Calcineurin-like phosphoesterase	8	8	8	0	0	0	0	8	1	1	1	1	1	1	1	1
Crenarchaeota specific genes (not in Euryarchaeota)
14601135	arCOG00580	COG01594	RPB9	K	DNA-directed RNA polymerase, subunit M/Transcription elongation factor TFIIS	19	20	19	0	0	0	0	8	1	1	1	1	1	2	1	1	1	1	1	1	1	1	1	1	1	1	1
14601909	arCOG04293	COG04919	-	J	Ribosomal protein S30	22	23	19	0	2	1	0	8	1	1	1	1	1	2	1	1	1	1	1	1	1	1	1	1	1	1	1
14601723	arCOG03119			S	DedA family membrane protein	22	24	19	0	2	1	0	8	1	1	1	1	1	1	1	1	1	1	1	1	1	1	1	1	1	1	1
126354103	arCOG04136	COG04888	-	J	Transcription elongation factor Elf1, Zn ribbon-containing protein	20	20	19	0	0	1	0	8	1	1	1	1	1	1	1	1	1	1	1	1	1	1	1	1	1	1	1
14601113	arCOG04166	COG04879	-	S	Uncharacterized protein conserved in archaea	19	20	19	0	0	0	0	8	1	1	1	1	1	1	2	1	1	1	1	1	1	1	1	1	1	1	1
118431688	arCOG04271		RPB8	K	DNA-directed RNA polymerase, subunit RPB8	19	19	19	0	0	1	0	8	1	1	1	1	1	1	1	1	1	1	1	1	1	1	1	1	1	1	1
118431831	arCOG04305	COG04830	RPS26B	J	Ribosomal protein S26	23	23	19	0	2	1	1	8	1	1	1	1	1	1	1	1	1	1	1	1	1	1	1	1	1	1	1
14602061	arCOG04319	COG04920	-	S	Predicted membrane protein	19	19	19	0	0	0	0	8	1	1	1	1	1	1	1	1	1	1	1	1	1	1	1	1	1	1	1
14602087	arCOG04327	COG04901	-	J	Ribosomal protein S25	21	22	19	0	1	1	0	8	1	1	1	1	1	1	1	1	1	1	1	1	1	1	1	2	1	1	1

## Sheet: gain-loss-expansion 
Analysis of gene loss, gain and family expansion using arCOG data and COUNT software (http://www.iro.umontreal.ca/~csuros/gene_content/count.html)
Gain in Thermoproteus tenax with probability >0.5													Probabilities for the loss of respective arCOGs in the following genomes:											Probabilities for the expansion of respective arCOGs in the following genomes:
												Estimated number of arCOGs lost in the lineage
Estimated number of arCOGs gained in the lineage					62.2732							90.1256	87.7778	116.81	73.9125	108.566	77.2583
arCOG number	Gene	Function as in http://www.ncbi.nlm.nih.gov/COG/grace/fiew.cgi		Annotation in arCOGs	Gain in		arCOG number	Gene	Function as in http://www.ncbi.nlm.nih.gov/COG/grace/fiew.cgi		Annotation in arCOGs	Loss in	Loss in	Loss in	Loss in	Loss in	Loss in			arCOG number	Gene	Function as in http://www.ncbi.nlm.nih.gov/COG/grace/fiew.cgi	Annotation in arCOGs	Expansion in	Expansion in	Expansion in	Expansion in	Expansion in	Expansion in
					Thermoproteus tenax (probabilities for the respective arCOGs)							Pyrobaculum aerophilum IM2	Pyrobaculum arsenaticum DSM 13514	Pyrobaculum islandicum DSM 4184	Thermoproteus neutrophilus V24Sta	Pyrobaculum calidifontis JCM 11548	Thermoproteus tenax							Pyrobaculum aerophilum IM2	Pyrobaculum arsenaticum DSM 13514	Pyrobaculum islandicum DSM 4184	Thermoproteus neutrophilus V24Sta	Pyrobaculum calidifontis JCM 11548	Thermoproteus tenax
arCOG02026	-	C		Polysulphide reductase	0.545259		arCOG00709	-	C		Aldehyde:ferredoxin oxidoreductase	0.921534	0	0.0311406	0.0311406	0	0.882173			arCOG02057	DsrA	C	Dissimilatory sulfite reductase (desulfoviridin), alpha and beta subunit	0	0	0	0	0	0.671614
arCOG01496	BisC	C		Molybdopterin oxidoreductase, contains molybdopterin-binding domain	0.800961		arCOG01356	-	C		Radical SAM superfamily enzyme	0	0	0	0	0	0.945424			arCOG00961	GlpC	C	Ferredoxin	0	0	0	0	0	0.67008
arCOG04386	LldP	C		L-lactate permease	0.571044		arCOG01355	-	C		Radical SAM superfamily enzyme	0	0	0	0	0	0.715667			arCOG00334	GlpC	C	Fe-S oxidoreductase	0.918467	0	0	0	0	0.623293
arCOG04537	NuoF	C		NADH:ubiquinone oxidoreductase, NADH-binding (51 kD) subunit	0.80169		arCOG00422	GalT	C		Galactose-1-phosphate uridylyltransferase	0	0	0.033622	0.033622	0	0.943127			arCOG01270	LivH	E	Branched-chain amino acid ABC-type transport system, permease component	0	0	0	0.819021	0	0.777208
arCOG03674	-	E		Thermopsin-like protease	0.800959		arCOG01462	NatB	C		ABC-type Na+ efflux pump, permease component	0	0	0	0	0.809502	0.583641			arCOG03654	PotE	E	Amino acid transporter	0	0	0	0	0	0.744679
arCOG01024	LivK	E		ABC-type branched-chain amino acid transport system, periplasmic component	0.771986		arCOG00288	NfnB	C		Nitroreductase	0	0	0	0	0	0.929864			arCOG04465	IlvC	E	Ketol-acid reductoisomerase	0	0	0	0	0	0.643222
arCOG01276	LivM	E		ABC-type branched-chain amino acid transport system, permease component	0.771986		arCOG00586	Soj	D		ATPase involved in chromosome partitioning, ParA family	0	0.71681	0.0238673	0.0238673	0	0.511059			arCOG04172	DapA	E	Dihydrodipicolinate synthase/N-acetylneuraminate lyase	0	0.834962	0	0	0	0.544235
arCOG03652	PotE	E		Amino acid transporter	0.80169		arCOG01533	DdpA	E		ABC-type dipeptide transport system, periplasmic component	0	0	0.0550774	0.0550774	0	0.794975			arCOG01512	HyuB	E	N-methylhydantoinase B/acetone carboxylase, alpha subunit	0	0	0	0	0	0.644445
arCOG03650	PotE	E		Amino acid transporter	0.801159		arCOG00923	GlnQ	E		ABC-type polar amino acid transport system, ATPase component	0	0	0	0	0	0.7129			arCOG04435	-	G	Phosphoenolpyruvate carboxylase	0	0	0	0	0	0.640097
arCOG00760	CitE	G		Citrate lyase beta subunit	0.794196		arCOG01798	HisM	E		ABC-type amino acid transport system, permease component	0	0	0	0	0	0.714438			arCOG00649	CysG	H	Uroporphyrinogen-III methylase	0.920815	0	0	0	0	0.651455
arCOG00156	UgpB	G		ABC-type sugar transport system, periplasmic component	0.573768		arCOG01799	HisJ	E		ABC-type amino acid transport/signal transduction system, periplasmic component/domain	0	0	0	0	0	0.836269			arCOG04536	-	H	Fe2+ dependent formamide hydrolase, cofactor Fo biosynthesis enzyme	0	0.83454	0	0	0	0.541305
arCOG00158	UgpE	G		ABC-type sugar transport system, permease component	0.756406		arCOG01029	GalK	G		Galactokinase	0	0	0.0335323	0.0335323	0	0.90307			arCOG04293	-	J	Ribosomal protein S30	0	0	0	0	0	0.639844
arCOG02688	ProP	G		permease of the major facilitator superfamily	0.800961		arCOG00445	-	H		Von Willebrand factor type A (vWA) domain	0	0	0	0	0	0.580015			arCOG01123	-	J	Translation initiation factor eIF-2B alpha subunit	0	0	0	0	0	0.639816
arCOG02689	ProP	G		permease of the major facilitator superfamily	0.800663		arCOG01262	FabG	I		Short-chain alcohol dehydrogenase	0	0	0	0	0	0.718361			arCOG04302	GlnS	J	Glutamyl- or glutaminyl-tRNA synthetase	0	0	0	0	0	0.639816
arCOG07424	HemN	H		Coproporphyrinogen III oxidase or related Fe-S oxidoreductase	0.796402		arCOG00975	Sun	J		tRNA or rRNA cytosine-C5-methylase	0	0	0	0	0	0.947969			arCOG00109	HemK	J	Methylase of polypeptide chain release factors	0	0	0.905346	0	0	0.58423
arCOG01483	NadC	H		Nicotinate-nucleotide pyrophosphorylase	0.554686		arCOG00921	-	K		Predicted transcriptional regulator	0	0	0	0	0	0.947899			arCOG00747	-	K	Predicted transcriptional regulator	0	0	0	0	0	0.681821
arCOG07315	-	I		Phospholipase D/Transphosphatidylase	0.662822		arCOG01055	-	K		Predicted transcriptional regulator	0	0	0	0	0	0.950944			arCOG00580	RPB9	K	DNA-directed RNA polymerase, subunit M/Transcription elongation factor TFIIS	0	0	0	0	0	0.640229
arCOG00774	MaoC	I		Acyl dehydratase	0.800874		arCOG02271	-	K		Predicted transcriptional regulator, c-terminal HTH-like domain	0	0	0.0333929	0.0333929	0	0.840812			arCOG00686	-	L	Transposase	0	0	0.676424	0	0	0.763686
arCOG01279	PaaJ	I		Acetyl-CoA acetyltransferase	0.777527		arCOG01304	-	L		Predicted nuclease of the RecB family	0	0	0	0	0	0.947885			arCOG01291	SplB	L	DNA repair photolyase	0	0	0	0	0	0.667508
arCOG01280	PaaJ	I		Acetyl-CoA acetyltransferase	0.777504		arCOG01074	MutT	L		NUDIX family hydrolase	0	0	0.897963	0	0.814619	0.70972			arCOG01165	-	L	DNA topoisomerase VI, subunit B	0	0	0	0	0	0.639531
arCOG00831	WecD	K		Acetyltransferase (GNAT) family	0.80169		arCOG03744	-	O		Predicted aspartyl protease	0	0	0	0.982284	0	0.923737			arCOG01818	VirB11	N	Type IV secretory pathway, VirB11 component, or related ATPase involved in archaeal flagella biosynthesis	0	0	0	0	0	0.792022
arCOG07836	-	L		Predicted NurA-like nuclease	0.779256		arCOG00704	AprE	O		Surface layer-associated subtilisin-like serine protease	0	0	0	0	0	0.669693			arCOG04036	-	O	dsrG glutathione-S-transferase homolog	0	0.86754	0	0	0	0.768746
arCOG02432	Smf	L		Predicted Rossmann fold nucleotide-binding protein involved in DNA uptake	0.80169		arCOG02871	DsbG	O		Protein-disulfide isomerase	0	0	0	0	0	0.581012			arCOG00319	PhoU	P	Phosphate uptake regulator	0	0	0	0	0	0.797599
arCOG01373	Gmd	M		GDP-D-mannose dehydratase	0.551398		arCOG00936	PflA	O		Pyruvate-formate lyase-activating enzyme	0	0	0	0.981396	0	0.628893			arCOG00219	ModA	P	ABC-type molybdate transport system, periplasmic component	0	0	0	0	0	0.779058
arCOG05966	PlcC	M		Phospholipase C	0.800471		arCOG00577	-	P		Predicted divalent heavy-metal cations transporter	0	0	0	0	0.80643	0.57688			arCOG04147	SodA	P	Superoxide dismutase	0	0	0	0	0	0.655241
arCOG07684	WcaA	M		Glycosyltransferase	0.801687		arCOG00221	AfuA	P		ABC-type Fe3+ transport system, periplasmic component	0	0	0	0	0	0.570859			arCOG04397	AmtB	P	Ammonia permease	0	0	0	0	0	0.645192
arCOG07240	WcaA	M		Glycosyltransferase	0.75706		arCOG00237	CitT	P		Di- and tricarboxylate transporter	0	0	0.0544731	0.0544731	0	0.700441			arCOG03303	FepB	P	ABC-type Fe3+-hydroxamate transport system, periplasmic component	0	0	0.0360678	0.0360678	0	0.626596
arCOG08085	-	N		Predicted component of Type II/IV secretion system	0.771986		arCOG04703	NorB	P		Nitric oxide reductase large subunit	0	0	0.0327714	0.0327714	0	0.563236			arCOG02250	CbiQ	P	ABC-type cobalt transport system, permease component CbiQ or related transporter	0	0	0	0	0	0.56524
arCOG07345	HtpX	O		Zn-dependent protease with chaperone function	0.80169		arCOG00168	PstA	P		ABC-type phosphate transport system, permease component	0	0	0	0	0	0.717644			arCOG00198	FepC	P	ABC-type cobalamin/Fe3+-siderophores transport system, ATPase component	0	0	0.0156603	0.0156603	0	0.560506
arCOG01912	-	O		Membrane protein implicated in regulation of membrane protease activity	0.621579		arCOG00231	PstB	P		ABC-type phosphate transport system, ATPase component	0	0	0	0	0	0.716006			arCOG00777	PaaI	Q	HGG motif-containing thioesterase, possibly involved in aromatic compounds catabolism	0	0	0	0	0	0.775112
arCOG06023	HoxN	P		High-affinity nickel permease	0.800961		arCOG00167	PstC	P		ABC-type phosphate transport system, permease component	0	0	0	0	0	0.717644			arCOG01071	HcaD	R	NAD(FAD)-dependent dehydrogenase	0	0	0	0	0	0.797902
arCOG02289	-	R		3-hydroxy-3-methylglutaryl CoA synthase family enzyme	0.801313		arCOG00213	PstS	P		ABC-type phosphate transport system, periplasmic component	0	0	0	0	0	0.717645			arCOG05543	HcaD	R	NAD(FAD)-dependent dehydrogenase	0	0	0	0	0	0.797638
arCOG03717	-	R		ATP-cone domain	0.693083		arCOG02019	SseA	P		Rhodanese-related sulfurtransferase	0	0	0.033495	0.033495	0	0.862897			arCOG00505	GloB	R	Zn-dependent hydrolase, glyoxylase family	0	0	0.911753	0	0	0.710042
arCOG01286	-	R		Predicted nucleic-acid-binding protein containing a Zn-ribbon	0.779256		arCOG00163	ThiP	P		ABC-type Fe3+ transport system, permease component	0	0	0	0	0	0.839792			arCOG00500	ElaC	R	Metal-dependent hydrolase of the beta-lactamase superfamily	0	0.842965	0	0	0	0.599863
arCOG01288	-	R		Predicted nucleic-acid-binding protein containing a Zn-ribbon	0.777527		arCOG03709	-	R		HEPN domain	0	0	0.0543387	0.0543387	0	0.684521			arCOG06982	-	R	ABC-type ATPase	0	0	0	0	0.70809	0.54021
arCOG01287	-	R		Predicted nucleic-acid-binding protein containing a Zn-ribbon	0.777452		arCOG00441	-	R		MoxR-like ATPase	0	0	0	0	0	0.944604			arCOG04014	-	S	Uncharacterized conserved protein	0	0	0	0	0	0.798082
arCOG07859	-	R		Predicted nucleotidyltransferase	0.801623		arCOG02935	-	R		Pirin-related protein	0	0	0.0327935	0.0327935	0	0.573106			arCOG05623	-	S	Uncharacterized conserved secreted (or membrane) protein	0	0	0	0	0	0.797596
arCOG07437	-	R		Transposase related protein	0.602277		arCOG03233	-	R		Predicted ATPase	0	0.989716	0	0	0	0.870718			arCOG05638	-	S	Uncharacterized conserved protein	0	0	0	0	0	0.797596
arCOG01492	-	R		Uncharacterized anaerobic dehydrogenase	0.800953		arCOG03408	-	R		Predicted ATPase (AAA+ superfamily)	0	0	0.998606	0	0	0.997062			arCOG07436	-	S	Uncharacterized conserved protein	0	0	0	0.831608	0	0.785585
arCOG01506	TorD	R		Uncharacterized component of anaerobic dehydrogenase	0.554682		arCOG02110	-	R		Predicted nucleotidyltransferase	0	0	0	0	0	0.589673			arCOG01807	-	S	Uncharacterized conserved protein	0	0	0	0	0	0.74199
arCOG09837	-	S		Uncharacterized conserved membrane protein	0.554686		arCOG00056	-	R		Predicted RNA-binding protein, contains THUMP domain	0	0	0	0	0	0.711715			arCOG03698	-	S	Uncharacterized protein conserved in archaea	0	0	0	0	0	0.731687
arCOG10102	-	S		C2H2 Zn finger protein	0.771986		arCOG02616	-	R		Radical SAM superfamily enzyme	0.994686	0	0	0	0	0.579774			arCOG03849	-	S	Uncharacterized conserved protein	0	0	0	0	0	0.692615
arCOG07857	-	S		HEPN domain, paREP1 subfamily	0.78845		arCOG01144	Icc	R		Predicted phosphohydrolase	0	0	0	0	0	0.569231			arCOG01667	-	S	Zinc finger domain containing protein (CDGSH-type)	0	0	0	0	0	0.681115
arCOG02499	-	S		NosD-like periplasmic protein	0.800961		arCOG01084	MazG	R		Predicted pyrophosphatase	0	0	0.0336172	0.0336172	0	0.941011			arCOG07015	-	S	Uncharacterized conserved protein	0	0	0	0	0	0.653968
arCOG03911	-	S		Predicted membrane protein	0.708704		arCOG01471	-	S		Hemerythrin HHE cation binding domain containing protein	0	0	0.0327894	0.0327894	0	0.571272			arCOG05379	-	S	Uncharacterized conserved protein	0	0	0	0	0	0.640433
arCOG10104	-	S		Predicted metal-binding protein	0.771986		arCOG07053	-	S		Uncharacterized conserved memrane protein	0	0	0.0327877	0.0327877	0	0.570502			arCOG03750	-	S	Uncharacterized conserved protein	0	0	0	0	0	0.639271
arCOG07746	-	S		Uncharacterized conserved protein	0.80164		arCOG03876	-	S		Uncharacterized conserved protein	0	0	0.0894427	0.0894427	0	0.950462			arCOG03740	-	S	Uncharacterized conserved protein	0.916174	0	0	0	0	0.617008
arCOG05339	-	S		Uncharacterized conserved protein	0.801617		arCOG05463	-	S		Uncharacterized conserved protein	0	0	0	0	0	0.947219			arCOG03766	-	S	Uncharacterized conserved protein	0	0	0	0	0.741222	0.610362
arCOG06009	-	S		Uncharacterized conserved protein	0.800311		arCOG05461	-	S		Uncharacterized conserved protein	0	0	0	0	0	0.937897			arCOG03779	McrB	V	GTPase subunit of restriction endonuclease	0	0	0.908731	0	0	0.651077
arCOG07428	-	S		Uncharacterized conserved protein	0.78845		arCOG04017	-	S		Uncharacterized conserved protein	0.0830007	0.0830007	0	0	0	0.928721			arCOG04192	-	V	CRISPR system related protein	0	0	0	0.887934	0	0.624609
arCOG07745	-	S		Uncharacterized conserved protein	0.78845		arCOG06072	-	S		Uncharacterized conserved protein	0.994704	0	0	0	0	0.598045
arCOG04025	-	S		Uncharacterized conserved protein	0.785195		arCOG03751	-	S		Uncharacterized conserved protein	0	0	0	0	0	0.580015
arCOG07056	-	S		Uncharacterized conserved protein	0.779256		arCOG05539	-	S		Uncharacterized conserved protein	0	0	0	0	0	0.580015
arCOG10112	-	S		Uncharacterized conserved protein	0.771986		arCOG05707	-	S		Uncharacterized conserved protein	0	0	0.0327917	0.0327917	0	0.572282
arCOG10118	-	S		Uncharacterized conserved protein	0.771986		arCOG01734	-	S		Uncharacterized conserved protein	0	0	0	0	0	0.923604
arCOG10120	-	S		Uncharacterized conserved protein	0.771986		arCOG02655	-	V		CRISPR system related protein	0.990329	0	0.987827	0	0	0.58084
arCOG10121	-	S		Uncharacterized conserved protein	0.771986		arCOG02661	-	V		CRISPR system related protein, RAMP superfamily	0.997991	0	0.993069	0	0	0.953598
arCOG07156	-	S		Uncharacterized conserved protein	0.554686		arCOG02657	-	V		CRISPR system related protein, RAMP superfamily	0.994788	0	0.992128	0	0	0.948386
arCOG01713	-	S		Uncharacterized conserved protein	0.603016		arCOG02665	-	V		CRISPR system related protein, RAMP superfamily	0.0745794	0.0745794	0.890234	0	0	0.854228
arCOG10105	-	S		Uncharacterized protein, containing metal-binding domain	0.744403		arCOG03891	-	V		CRISPR system related protein, RAMP superfamily	0.992799	0	0.990215	0	0	0.592068
arCOG10119	-	S		Zn finger protein	0.771986		arCOG00727	-	V		PIN domain containing protein	0.899156	0	0.0303418	0.0303418	0	0.840948
arCOG10123	-	S		Zn finger protein	0.757084		arCOG02666	-	V		Predicted CRISPR-associated polymerase	0.994788	0	0.992128	0	0	0.948368
arCOG08093	-	S		Zn zinger protein	0.771937		arCOG02841	MdlB	V		ABC-type multidrug transport system, ATPase and permease component	0	0.994246	0.991634	0	0	0.775204
arCOG07687	-	V		CRISPR system related protein	0.779256
